# Supplementary material for: F-doped NiCo2O4@CoMoO4 as an advanced electrode for aqueous Zn-ion batteries
Source: Royal Society of Chemistry journal article supplement (doi:10.1039/d3cc00970j), 2023-01-01
Supplement: d3cc00970j1.pdf [file d3cc00970j1.pdf]

## Supplementary Material

### **F-doped NiCo<sub>2</sub>O<sub>4</sub>@CoMoO<sub>4</sub> as an advanced electrode for aqueous Zn-ion batteries**

Ze Cen<sup>a</sup>, Fang Yang<sup>a\*</sup>, Jie Wan<sup>a</sup>, Kaibing Xu<sup>b</sup>

<sup>a</sup> College of Mechanical and Automotive Engineering, Shanghai University of Engineering Science, Shanghai, 201620, China

<sup>b</sup> Research Center for Analysis and Measurement, Donghua University, Shanghai, 201620, China

E-mail: [yfang@sues.edu.cn](mailto:yfang@sues.edu.cn)

## **1. Experimental Section**

### *1.1 Material characterization*

Scanning electron microscopy (SEM; Hitachi, S-4800), transmission electron microscopy (TEM; FEI, Talos F200S) including energy-dispersive X-ray spectrometry (EDS), X-ray diffraction (XRD, Rigaku, D/max-2550 PC), X-ray photoelectron spectroscopy (XPS; Thermo Fisher, Escalab 250Xi), Electron paramagnetic resonance (EPR; Bruker, A300-10/12).

### *1.2 Electrochemical measurements*

On the electrochemical workstation (PGSTAT302N, The Netherlands), the three-electrode system was used to investigate the electrochemical performance of the obtained sample electrode. In 1 M KOH solution, the obtained sample, platinum (Pt), and saturated calomel electrode (SCE) were respectively used as working electrode,

counter electrode, and reference electrode. The Zn-ion battery was constructed with a Zn plate ( $1 \times 1 \text{ cm}^2$ ) and the mixed solution with 1 M KOH and 20 mM  $\text{Zn}(\text{CH}_3\text{COO})_2$ .

## 2. Calculation

For the  $\text{NiCo}_2\text{O}_4@\text{F-CoMoO}_4//\text{Zn}$  battery,  $\text{NiCo}_2\text{O}_4@\text{CoMoO}_4//\text{Zn}$  battery and three-electrode system, we calculated the electrode's mass specific capacity ( $\text{mA h g}^{-1}$ ) based on this equation:

$$C = \frac{I \Delta t}{3.6m}$$

Where, C is the specific capacity ( $\text{mA h g}^{-1}$ ), I is the discharging current (A), m is the total mass of active materials (g) and  $\Delta t$  is discharge time (s).

The energy density (E) and power density (P) of the two electrodes in the  $\text{NiCo}_2\text{O}_4@\text{F-CoMoO}_4//\text{Zn}$  battery,  $\text{NiCo}_2\text{O}_4//\text{Zn}$  battery are calculated based on the following equations:

$$E = \frac{I}{3.6m} \int V dt$$
$$P = \frac{E}{\Delta t}$$

Where I is the discharging current (A), V is the discharging voltage (V), dt is the time differential, m is the total mass of the active electrode materials (g), and  $\Delta t$  is the discharging time (s).

## 3. Figures

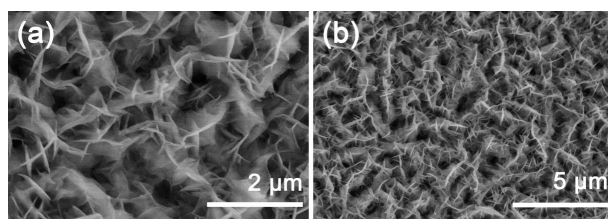

**Fig. S1.** SEM images of NiCo<sub>2</sub>O<sub>4</sub>@CoMoO<sub>4</sub> nanosheets.

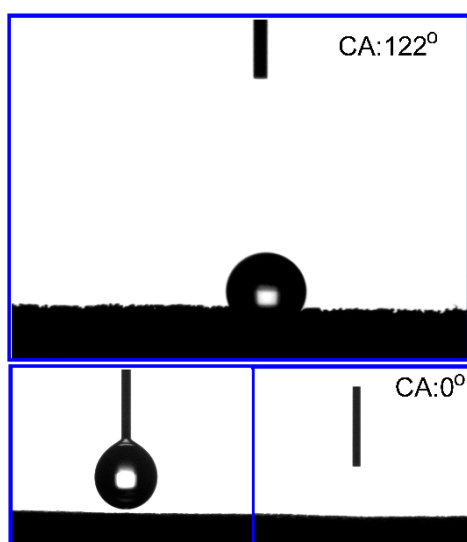

**Fig. S2.** Contact angles of NiCo<sub>2</sub>O<sub>4</sub>@CoMoO<sub>4</sub>/Ni foam (upper image) and NiCo<sub>2</sub>O<sub>4</sub>@F-CoMoO<sub>4</sub>/Ni foam (lower images).

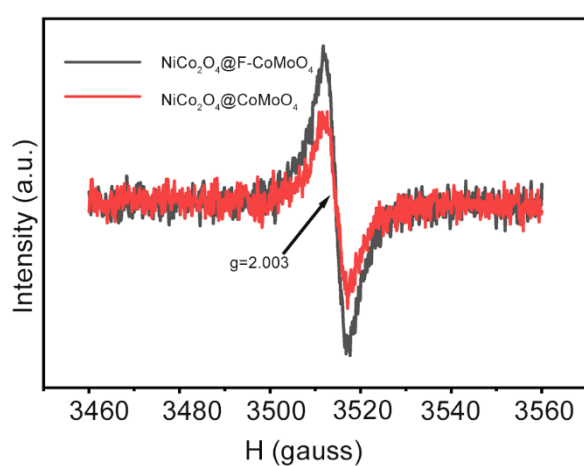

**Fig. S3.** EPR spectra of NiCo<sub>2</sub>O<sub>4</sub>@CoMoO<sub>4</sub> and NiCo<sub>2</sub>O<sub>4</sub>@F-CoMoO<sub>4</sub> samples.

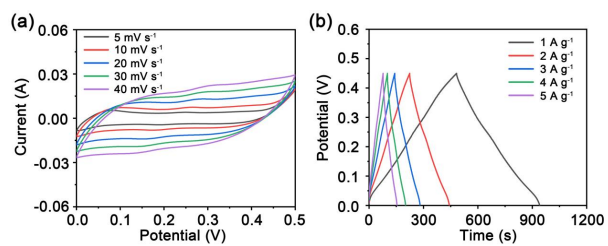

**Fig. S4.** (a) CV curves and (b) CD curves of NiCo<sub>2</sub>O<sub>4</sub>@CoMoO<sub>4</sub> electrode.

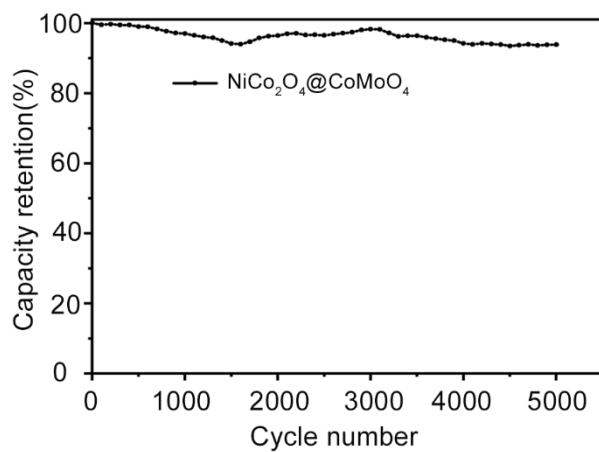

**Fig. S5.** Cycle performance of the NiCo<sub>2</sub>O<sub>4</sub>@CoMoO<sub>4</sub>//Zn battery.

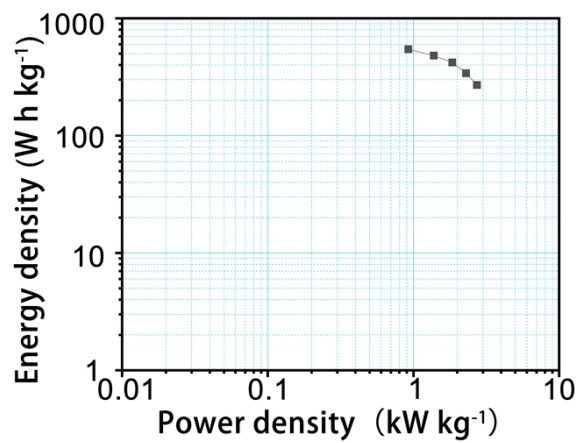

**Fig. S6.** The Ragone plot of NiCo<sub>2</sub>O<sub>4</sub>@F-CoMoO<sub>4</sub>//Zn battery.
